# Supplementary material
Source: bioRxiv or medRxiv preprint supplement (https://medrxiv.org/highwire/filestream/72493/field_highwire_adjunct_files/1/2020.02.21.20024737-2.pdf)

北京清华长庚医院伦理委员会  
伦理审查批件

审查编号：16152-0110

项目名称：富含血小板血浆促进前交叉韧带重建腱骨愈合的临床研究

项目来源：2017年首都特色临床研究

项目负责人：姓名 陈连旭 科室 骨科

审查类型：初始审查 跟踪审查：分类\_\_\_\_\_ 复审申请

审查方式：快速审查 会议审查

审查意见：同意该项目申报 2017 年首都特色临床研究项目。

根据国家卫生计生委《涉及人的生物医学研究伦理审查办法（2016）》、原国家食品药品监督管理局《药物临床试验质量管理规范（2003）》、国家食药监总局、国家卫生计生委《医疗器械临床试验质量管理规范（2016）》、WMA《赫尔辛基宣言（2013）》和 CIOMS《人体生物医学研究国际道德指南》的伦理原则，经本伦理委员会审查，“富含血小板血浆促进前交叉韧带重建腱骨愈合的临床研究”项目符合医学伦理基本原则，同意其参加纵向项目申报。

其他要求：

本批件只作为申报 2017 年首都特色临床研究项目之用。

北京清华长庚医院医学伦理委员会

2016年12月13日

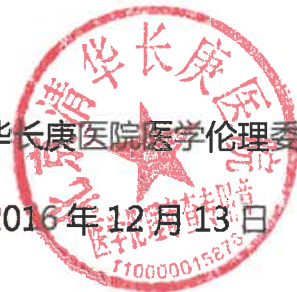

Supplement: Supplementary file [file 2020.02.21.20024737-2.pdf]
